# Supplementary material
Source: Royal Society of Chemistry journal article supplement (doi:10.1039/d6tc00655h)
Supplement: d6tc00655h1.pdf [file d6tc00655h1.pdf]

# Supplementary Material

## Wolframite-type $\text{MgReO}_4$ under pressure: An experimental and theoretical study

Sinhue López-Moreno,<sup>\*,†</sup> Neha Bura,<sup>¶</sup> Pablo Botella,<sup>¶</sup> Catalin Popescu,<sup>§</sup> and  
Daniel Errandonea<sup>\*,¶</sup>

<sup>†</sup>*División de Materiales Avanzados-IPICYT/SECIHTI, Camino a la presa de San José  
2055 Col. Lomas 4a sección, San Luis Potosí 78216, México*

<sup>‡</sup>*Grupo de Ciencia e Ingeniería Computacionales-Centro Nacional de Supercómputo,  
IPICYT, Camino a la presa de San José 2055 Col. Lomas 4a sección, San Luis Potosí  
78216, México*

<sup>¶</sup>*Departamento de Física Aplicada-ICMUV, MALTA Consolider Team, Universidad de  
Valencia, Dr. Moliner 50, Burjassot, 46100 Valencia, Spain*

<sup>§</sup>*CELLS-ALBA Synchrotron Light Facility, Cerdanyola, 08290 Barcelona, Spain*

E-mail: [sinhue.lopez@ipicyt.edu.mx](mailto:sinhue.lopez@ipicyt.edu.mx); [daniel.errandonea@uv.es](mailto:daniel.errandonea@uv.es)

# Contents

|          |                               |          |
|----------|-------------------------------|----------|
| <b>1</b> | <b>Description</b>            | <b>2</b> |
| <b>2</b> | <b>Computational Details</b>  | <b>2</b> |
| <b>3</b> | <b>Structural parameters</b>  | <b>3</b> |
| <b>4</b> | <b>Vibrational properties</b> | <b>4</b> |
|          | <b>References</b>             | <b>6</b> |

## 1 Description

In this **Supplementary Material**, the theoretical results calculated without spin-orbit coupling are presented, which cause a distortion of the crystal structure at high pressure, affecting the vibrational properties of  $\text{MgReO}_4$ .

## 2 Computational Details

Total-energy calculations have been performed within the framework of the density functional theory (DFT)<sup>1</sup> and the projector-augmented wave (PAW)<sup>2,3</sup> method as implemented in the Vienna *Ab initio* Simulation Package (VASP).<sup>4</sup> We have considered six valence electrons for O atoms ( $2s^2, 2p^4$ ), thirteen for Re ( $5p^6, 5d^5, 6s^2$ ), and eight for Mg ( $2p^6, 3s^2$ ) in the PAW pseudo-potential. We have used a plane-wave energy cutoff of 520 eV to ensure high precision in our calculations. The exchange-correlation energy has been described within the generalized-gradient approximation (GGA) in the Perdew-Burke-Ernzerhof for solids (PBEsol) formulation.<sup>5</sup>

The Monkhorst-Pack scheme has been employed for the Brillouin-zone (BZ) integrations<sup>6</sup> with a mesh  $4 \times 4 \times 4$ , which corresponds to a set of sixteen special  $k$ -points in the irreducible

BZ. In the relaxed equilibrium configuration, the forces are less than one meV/Å per atom in each Cartesian direction. The highly converged results on forces are required to calculate the dynamical matrix using the direct force constant approach.<sup>7</sup> This allows us to identify the irreducible representation and the character of the phonon modes at the zone center ( $\Gamma$  point).

### 3 Structural parameters

According to Fig. 1 (b), the theoretical lattice parameter  $a$  is very similar to the experimental one. However, our calculations' lattice parameters  $b$  and  $c$  present a deviation from the experimental results around  $\approx 10$  GPa. The change in  $b$  and  $c$  lattice parameters originated from a distortion of the  $\text{ReO}_6$  octahedra in the  $xy$  plane is due to abrupt changes in the angles of interatomic distances  $d_2$  and  $d_3$  inside the  $\text{ReO}_6$  octahedra, see the inset of Fig. 2 (d). Such distortion is responsible for the abrupt change in the  $\beta$  angle, as seen in the inset of Fig. 1 (a). However, despite the change in interatomic distances, there is no appreciable change in the polyhedral volume of the  $\text{ReO}_6$  octahedra [ $V_{\text{ReO}_6}$ , Fig. 2 (a)] but an increase in the distortion parameter ( $\Delta_d$ ) of both polyhedra.

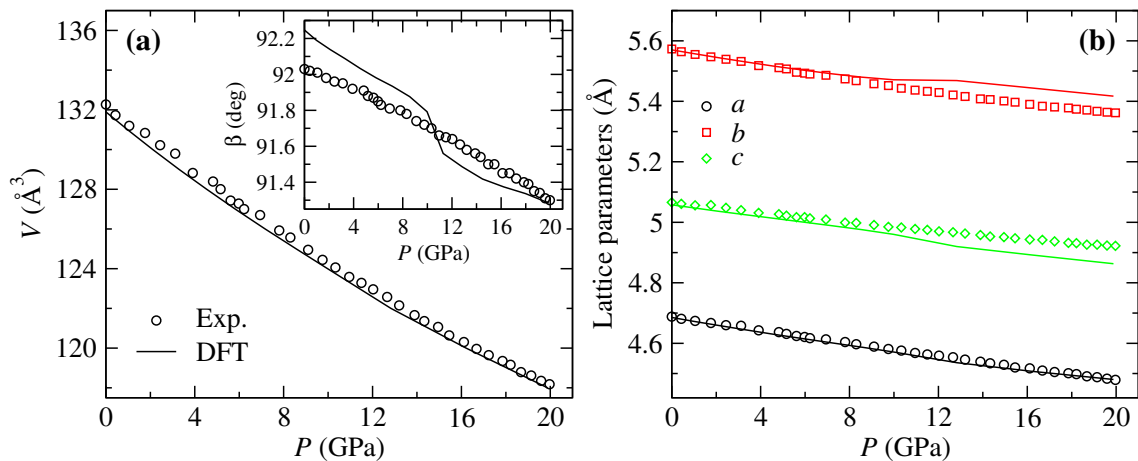

Figure 1: Pressure evolution of (a) unit-cell volume and  $\beta$  angle in the inset; (b) unit-cell lattice parameters of  $\text{MgReO}_4$ . Symbols correspond to experiments and solid lines to results from calculations.

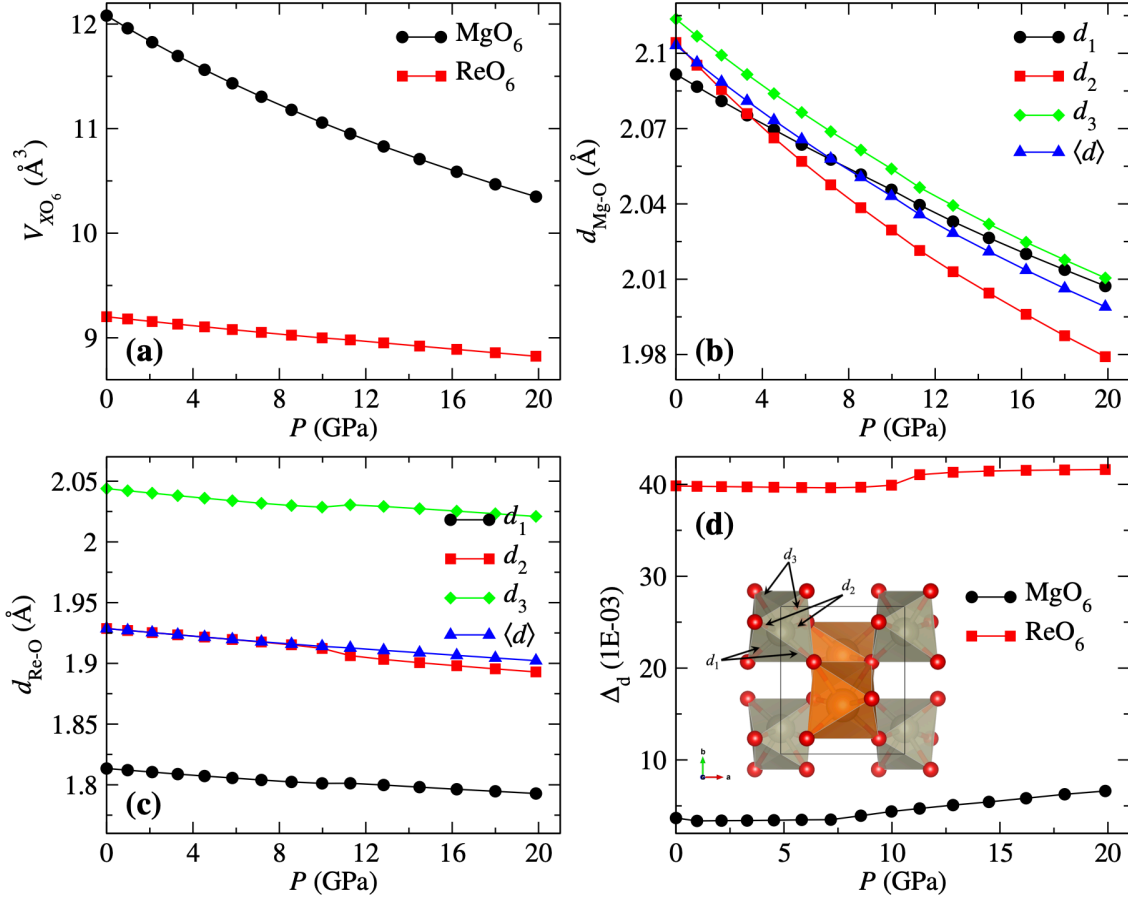

Figure 2: Structural parameters of  $\text{MgReO}_4$  as a function of pressure: (a) polyhedral volumes  $V_{\text{MgO}_6}$  and  $V_{\text{ReO}_6}$ , interatomic distances ( $d_x$ ) inside the (b)  $\text{MgO}_6$  and (c)  $\text{ReO}_6$  distorted octahedra, and (d) distorted parameter  $\Delta_d$ . The inset of (d) shows the interatomic distances responsible for the distortion at  $\approx 10$  GPa.

To understand the origin of the distortion within this methodology without spin-orbit coupling, we performed several calculations fixing the  $\beta$  angle and the lattice parameters  $b$  and  $c$  to the low-pressure trend. Our results show that, under these conditions, the crystal structure is subjected to non-hydrostatic stress, resulting in an energy change of 3 meV/f.u.

## 4 Vibrational properties

The phonon frequencies computed with the direct force constant approach<sup>7</sup> at ambient pressure (in  $\text{cm}^{-1}$ ), their pressure coefficients ( $d\omega/dP$ , in  $\text{cm}^{-1}/\text{GPa}$ ), and the Grüneisen parameters ( $\gamma$ ) are listed in Table 1. Where  $d\omega/dP$  and  $\gamma$  were obtained from ambient pressure

up to 10 GPa in order to avoid the changes due to the structural distortion observed at  $\approx 10$  GPa. The pressure evolution of the Raman and infrared phonon frequencies appear in Fig. 3 (a) and (b), respectively. As can be seen, the Raman modes are more affected by the distortion of the crystalline structure at  $\approx 10$  GPa.

Table 1: Computed Raman and infrared phonon frequencies ( $\omega$ , in  $\text{cm}^{-1}$ ) of  $\text{MgReO}_4$  at the  $\Gamma$  point and ambient pressure. We also included the pressure coefficients ( $d\omega/dP$ , in  $\text{cm}^{-1}/\text{GPa}$ ) and the Grüneisen parameters ( $\gamma$ ).  $d\omega/dP$  and  $\gamma$  were computed in the pressure range 0-10 GPa.

|       | Raman    |              |          | Infrared |              |          |       |
|-------|----------|--------------|----------|----------|--------------|----------|-------|
|       | $\omega$ | $d\omega/dP$ | $\gamma$ | $\omega$ | $d\omega/dP$ | $\gamma$ |       |
| $B_g$ | 116.85   | 0.13         | 0.17     | $B_u$    | 176.96       | 0.73     | 0.71  |
| $A_g$ | 183.64   | -0.07        | -0.06    | $B_u$    | 234.37       | -1.04    | -0.80 |
| $B_g$ | 191.41   | 0.29         | 0.24     | $A_u$    | 253.79       | 1.22     | 0.82  |
| $B_g$ | 225.97   | 0.49         | 0.34     | $B_u$    | 267.43       | -0.63    | -0.43 |
| $B_g$ | 241.61   | 2.25         | 1.40     | $A_u$    | 307.43       | 0.33     | 0.19  |
| $B_g$ | 273.40   | 1.06         | 0.60     | $B_u$    | 311.26       | 3.43     | 1.77  |
| $A_g$ | 280.97   | -0.98        | -0.54    | $B_u$    | 326.51       | 4.58     | 2.19  |
| $A_g$ | 293.35   | 2.28         | 1.18     | $A_u$    | 345.09       | 1.03     | 0.52  |
| $A_g$ | 345.82   | 4.51         | 1.93     | $A_u$    | 414.94       | 4.28     | 1.66  |
| $B_g$ | 346.59   | 4.69         | 2.00     | $B_u$    | 462.98       | 5.31     | 1.83  |
| $A_g$ | 399.10   | 1.17         | 0.45     | $A_u$    | 494.80       | 4.06     | 1.34  |
| $B_g$ | 403.87   | 4.48         | 1.66     | $B_u$    | 540.73       | 3.75     | 1.15  |
| $B_g$ | 514.38   | 3.10         | 0.92     | $A_u$    | 619.43       | 3.99     | 1.07  |
| $A_g$ | 552.58   | 2.52         | 0.70     | $B_u$    | 731.74       | 3.68     | 0.85  |
| $B_g$ | 631.17   | 4.63         | 1.11     | $A_u$    | 753.26       | 2.95     | 0.67  |
| $A_g$ | 671.60   | 3.27         | 0.74     |          |              |          |       |
| $B_g$ | 732.18   | 4.60         | 0.96     |          |              |          |       |
| $A_g$ | 873.35   | 4.41         | 0.77     |          |              |          |       |

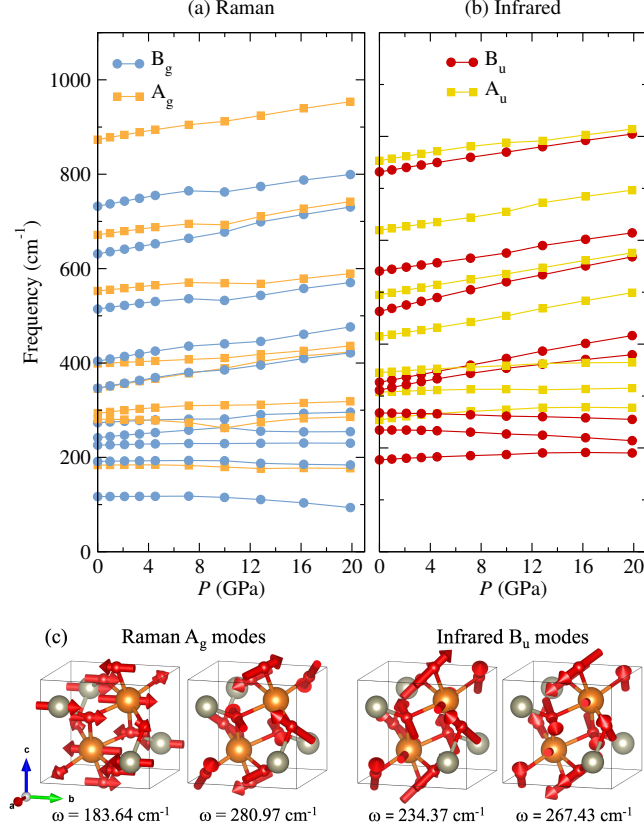

Figure 3: Pressure dependence of the (a) Raman and (b) infrared phonon frequencies of  $\text{MgReO}_4$ . (c) Lattice vibrations at ambient pressure of phonon frequencies with negative phonon pressure coefficients at the  $\Gamma$  point, see Table 1.

## References

- (1) Jones, R. O. Density functional theory: Its origins, rise to prominence, and future. *Rev. Mod. Phys.* **2015**, *87*, 897–923, DOI: <https://doi.org/10.1103/RevModPhys.87.897>.
- (2) Blöchl, P. E. Projector augmented-wave method. *Phys. Rev. B* **1994**, *50*, 17953–17979, DOI: <https://doi.org/10.1103/PhysRevB.50.17953>.
- (3) Kresse, G.; Joubert, D. From ultrasoft pseudopotentials to the projector augmented-wave method. *Phys. Rev. B* **1999**, *59*, 1758–1775, DOI: <https://doi.org/10.1103/PhysRevB.59.1758>.
- (4) Kresse, G.; Furthmüller, J. Efficient iterative schemes for *ab initio* total-energy cal-

culations using a plane-wave basis set. *Phys. Rev. B* **1996**, *54*, 11169–11186, DOI: <https://doi.org/10.1103/PhysRevB.54.11169>.

(5) Csonka, G. I.; Perdew, J. P.; Ruzsinszky, A.; Philipsen, P. H. T.; Lebègue, S.; Paier, J.; Vydrov, O. A.; Ángyán, J. G. Assessing the performance of recent density functionals for bulk solids. *Phys. Rev. B* **2009**, *79*, 155107, DOI: <https://doi.org/10.1103/PhysRevB.79.155107>.

(6) Monkhorst, H. J.; Pack, J. D. Special points for Brillouin-zone integrations. *Phys. Rev. B* **1976**, *13*, 5188–5192, DOI: <https://doi.org/10.1103/PhysRevB.13.5188>.

(7) Parlinski, K. Computer Code PHONON. See: <http://wolf.ifj.edu.pl/phonon>, 2008.
